# Supplementary material for: Flexible touch sensor with finely patterned Ag nanowires buried at the surface of a colorless polyimide film
Source: Royal Society of Chemistry journal article supplement (doi:10.1039/c5ra01657f), 2015-01-01
Supplement: c5ra01657f1.pdf [file c5ra01657f1.pdf]

## Supplementary Information

### Flexible touch sensor with finely patterned Ag nanowires buried at the surface of a colorless polyimide film

Youngmin Kim,<sup>†</sup> Chang-Hyun Song,<sup>†</sup> Min-Gi Kwak, Byeong-Kwon Ju\* and Jong-Woong Kim\*

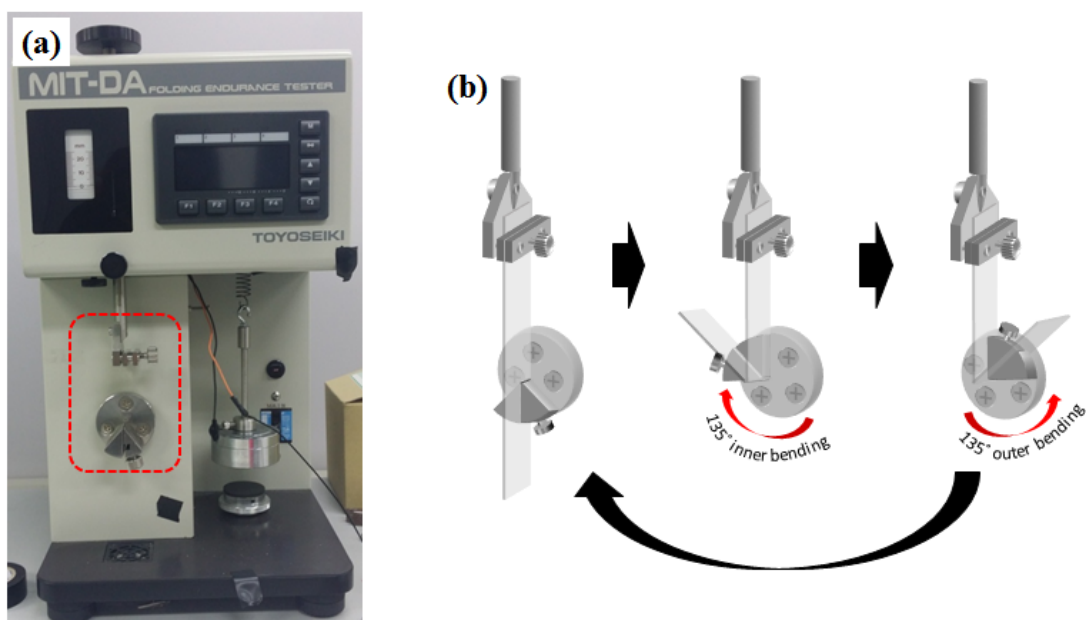

**Fig. S1** An apparatus for cyclic bend testing: (a) an automatic bending machine and (b) a schematic description of bending motion.

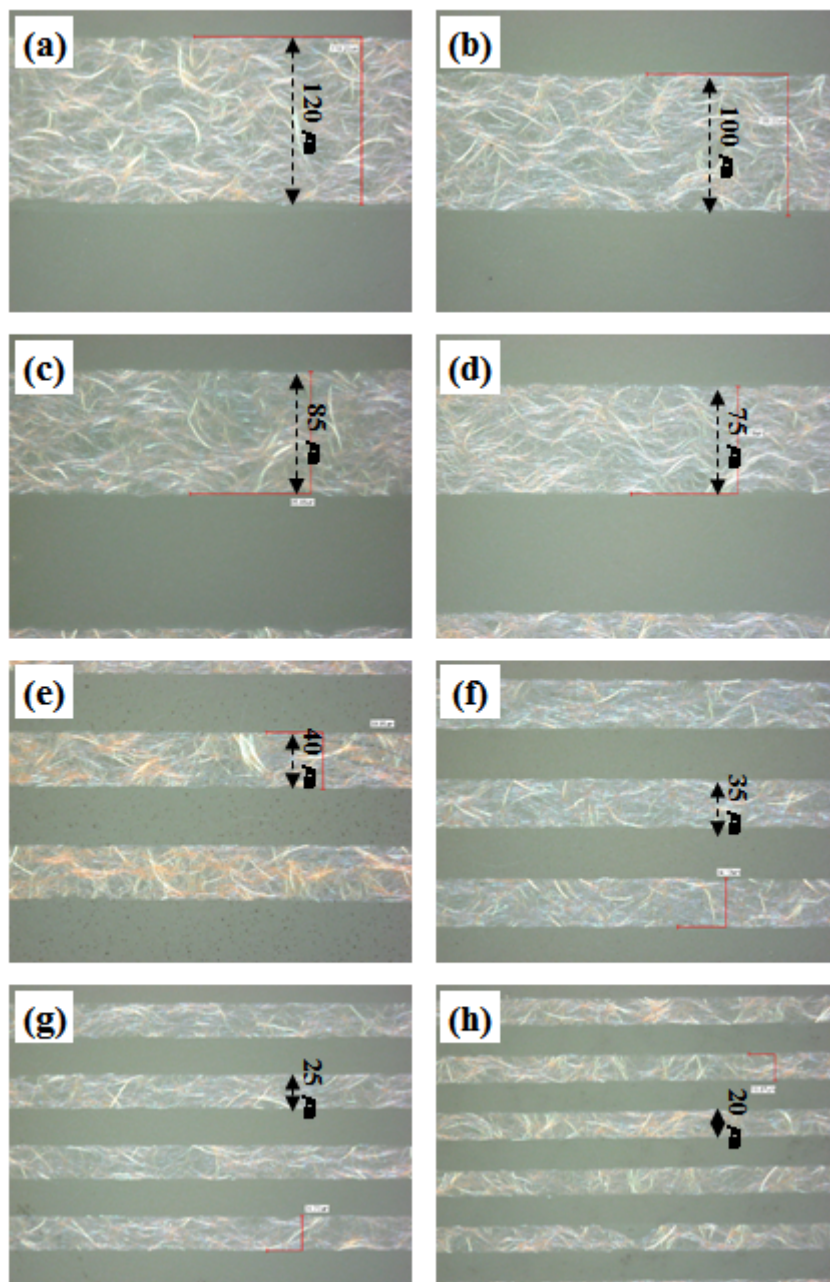

**Fig. S2** AgNW circuits patterned with decreasing line width: (a) 120  $\mu\text{m}$ , (b) 100  $\mu\text{m}$ , (c) 85  $\mu\text{m}$ , (d) 75  $\mu\text{m}$ , (e) 40  $\mu\text{m}$ , (f) 35  $\mu\text{m}$ , (g) 25  $\mu\text{m}$ , and (h) 20  $\mu\text{m}$ .

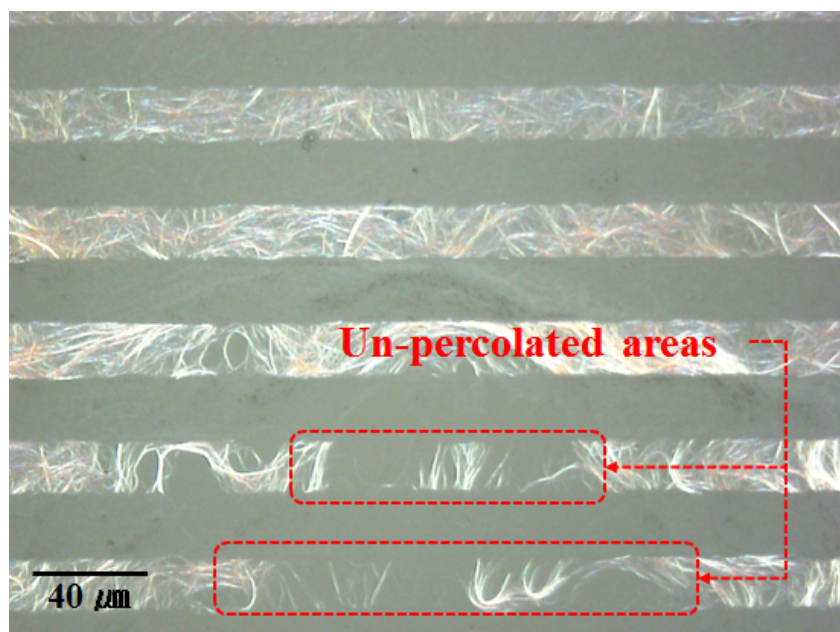

**Fig. S3** AgNW circuits patterned in a width of 20  $\mu\text{m}$ .

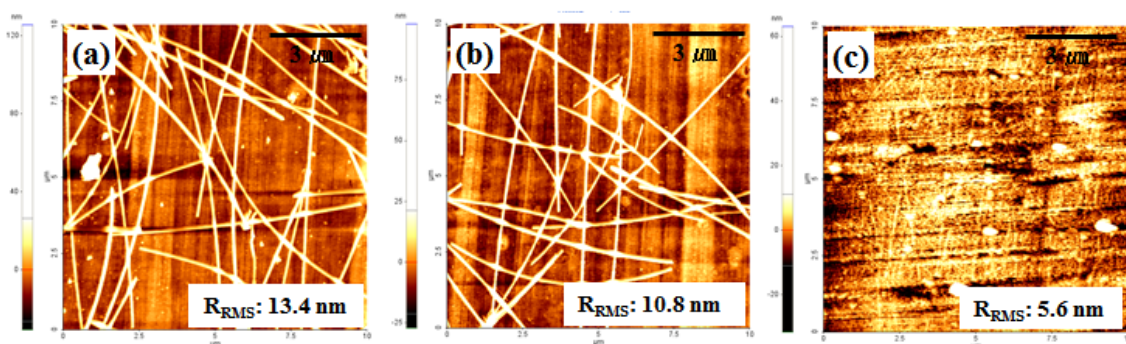

**Fig. S4** Morphologies analysed by AFM: (a) pristine AgNWs coated on a Kapton film, (b) AgNWs on a Kapton irradiated by IPL, and (c) AgNWs embedded in a cPI.

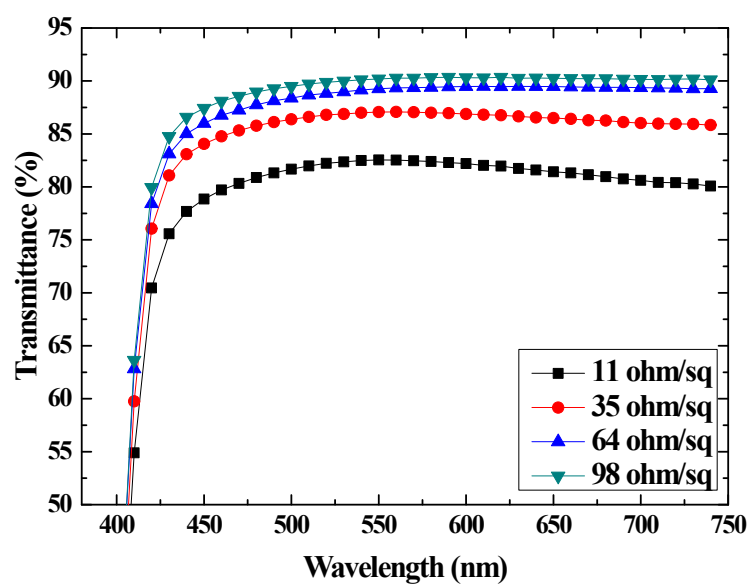

Fig. S5 Transmittance spectrums for the fabricated electrodes with varying sheet resistance.
